# Supplementary material
Source: PubMed Central journal article supplement (PMC2758137)
Supplement: ddp353_1.pdf [file ddp353_1.pdf]

Table S1. Details of the measured amplicons and the PCR primers

| Gene Name<br>(alias)                 | Genomic location (NCBI b36.1)<br>CpG sites analyzed <sup>a</sup> | Function<br>Features / (genetic) associations                                                                   | Primer forward <sup>b</sup><br>Primer reverse <sup>c</sup> |
|--------------------------------------|------------------------------------------------------------------|-----------------------------------------------------------------------------------------------------------------|------------------------------------------------------------|
| <b>IL10</b>                          | chr1:205012634-205012962                                         | Anti-inflammatory                                                                                               | TGATTGGTTGAATATGAATTTTTGTAT                                |
|                                      | CpG 1, 2&3, 4                                                    | Promoter, MIR retrotransposon, CpG 4 is an ATF6, XBP1, PPARG binding site / atherosclerosis, schizophrenia      | CACCCCTCATTTTACTTAAAAA                                     |
| <b>GNASAS</b><br>( <i>NESPAS</i> )   | chr20:56859210-56859503                                          | Imprinting control region GNAS locus                                                                            | GTAATTTGTGGTATGAGGAAGAGTGA                                 |
|                                      | CpG 1&2, 3&4, 6, 7, 8&9, 10-12, 13&14, 15, 17-19                 | promoter / Pseudohypoparathyroidism 1B, QTL blood pressure                                                      | TAAATAACCCAACCTAAATCCCAACA                                 |
| <b>INSIGF</b><br>( <i>INS</i> )      | chr11:2138912-2139216                                            | Embryonic growth, metabolism                                                                                    | GTTTTGAGGAAGAGGTGTTGA                                      |
|                                      | CpG 2, 4, 5, 6                                                   | Promoter, imprinted / SGA, <i>IGF2</i> levels in umbilical cord                                                 | ACCTAAAATCCAACCACCTAA                                      |
| <b>LEP</b>                           | chr7:127668290-127668646                                         | Appetite regulation & fat metabolism                                                                            | GTTTTTGGAGGGATATTAAGGATTT                                  |
|                                      | CpG 1, 16&17, 19-21, 22, 25, 27                                  | Promoter, CpG 22 is an C/EBP binding site controlling basal gene expression / birth weight, BMI, blood pressure | CTACCAAAAAAAAAACCAACAAAAAAAA                               |
| <b>MEG3</b><br>( <i>GTL2</i> )       | chr14:100361166-100361395                                        | Embryonic growth inhibitor                                                                                      | TTTTTTTTAATAGTATTTTGATTTTTG                                |
|                                      | CpG 2, 3, 4, 5&6, 8&9, 10&11                                     | Promoter, CTCF binding site, part of DLK1-DIO3 imprinting control mechanism                                     | AAATAATCCCCACACACATACC                                     |
| <b>ABCA1</b>                         | chr9:106730323-106730642                                         | Cholesterol transport                                                                                           | ATTTTATTGGTGTTTTGGTTGT                                     |
|                                      | CpG 1, 3&4, 6-9, 10-13, 15&16, 17&18, 19-21, 22&23, 24, 25       | Promoter, CpG 10-13 Arnt & USF1 binding site / atherosclerosis, cholesterol levels                              | ATCAAAACCTATACTCTCCCTCCTC                                  |
| <b>IGF2R</b>                         | chr6:160346346-160346595                                         | Embryonic growth, apoptosis                                                                                     | AGGTAGAAAAAGGTTTTGGAAG                                     |
|                                      | CpG 4&5, 8-10, 11-13, 20&21                                      | Putatively imprinted human IGF2 DMR2 / birth weight                                                             | CAAATCTTAAAACTAACTAAAAACC                                  |
| <b>APOC1</b>                         | chr19:50109726-50110115                                          | Lipid metabolism                                                                                                | GGAGGAGGGAGATTAATATTAATTTGT                                |
|                                      | CpG 1, 2, 3, 4, 10, 11                                           | Intron & exons / coronary artery disease                                                                        | ACCCCAAACCTATAACCACCTT                                     |
| <b>FTO</b>                           | chr16:52383225-52383575                                          | Development, nucleic acid demethylation                                                                         | GTTTGTAAATTTAGTATTTTGGGAGGT                                |
|                                      | CpG 8&9, 10&11, 17, 19                                           | Linkage area GWAS / BMI, Diabetes                                                                               | TTTATTTCCATTTATCCATTCTCAA                                  |
| <b>KCNQ1OT1</b><br>( <i>KvDMR1</i> ) | chr11:2677737-2678040                                            | Imprinting control region 11p15.5                                                                               | TTTGGTAGGATTTTGTGAGGAGTTTT                                 |
|                                      | CpG 1, 6, 8&9, 10-12, 15, 16,                                    | Minimal repressor, promoter / Diabetes, Beckwith-                                                               | CTCACACCAACCAATACCTCATAC                                   |

|                  |                                                       |                                                                 |                              |
|------------------|-------------------------------------------------------|-----------------------------------------------------------------|------------------------------|
|                  | 17&18, 20, 21, 24, 25, 26&27                          | Wiedemann syndrome, Silver Russell syndrome                     |                              |
| <b>NR3C1</b>     | chr5:142763741-142764104                              | HPA-axis                                                        | GATTTGGTTTTTTTTGGGG          |
| (GR)             | CpG 4, 7&8, 9, 10&11, 14, 15&16, 17-20, 31, 33&34, 42 | Exon 17, CpG 7 is part of a NGF1-A binding site / depression    | TCCCTTCCCTAAAACCT            |
| <b>TNF</b>       | chr6_qbl_hap2:2790712-2791113                         | Pro-inflammatory                                                | GGGTATTTTTGATGTTTGTGTGTT     |
|                  | CpG 1-3, 5, 9, 10, 11                                 | Promoter / Graves' disease, asthma                              | CAATACTCATAATATCCTTTCCAAAAAA |
| <b>GRB10</b>     | chr7:50818080-50818483                                | IIS inhibitor                                                   | GGAATTTTAGGATTAAATTTATGTGA   |
|                  | CpG 7, 8, 17, 22&23, 24, 25                           | Promoter, CpG island / diabetes type 2, birth size              | AACTTCCAAAAAAAACCTCTCC       |
| <b>CRH</b>       | chr8:67253246-67253686                                | Stress response/ HPA-axis                                       | TGGTTGTTGTTTTTTTGGTAGG       |
| (CRP, CRF)       | CpG 1, 2, 9, 10                                       | Promoter, CpG 2 and 10 are TFBS / length of pregnancy, HPA axis | AATTTCTCCACTCCAAAACCTAAA     |
| <b>GNAS(A/B)</b> | chr20:56896823-56897145                               | Growth/Lypolytic processes                                      | ATGATTTAATTAAGGTTTTAGGAAAGG  |
|                  | CpG 1, 3&4, 7, 8, 9&10, 12, 13-15, 16-19              | Promoter / blood pressure QTL                                   | TAAAAATACAAAACCTCCCCTACTC    |

<sup>a</sup> CpG sites measured in each amplicon. Counting starts from the part of the amplicon that has the identical sequence of the forward primer. Multiple CpG sites that are named together between brackets were not individually resolved by fragmentation in the mass spectrometer and thus measured simultaneously.

<sup>b</sup> Forward primer that will amplify the bisulfite converted genomic DNA. For the EpiTyper methodology a 10mer spacer tag is added at the 5' primer end with the following sequence: 5'-AGGAAGAGAG+primer

<sup>c</sup> Reverse primer that will amplify the bisulfite converted genomic DNA. For the EpiTyper methodology a T7 promoter is added to the 5' primer end with the following sequence: 5'-CAGTAATACGACTCACTATAGGGAGAAGGCT+primer

Abbreviations: MIR = type of retrotransposon, QTL = quantitative trait locus, SGA = small for gestational age, BMI = body mass index, TFBS = transcription factor binding sites, HPA = hypothalamus-Pituitary axis, IIS = insulin signaling, NGF1-A = a transcription factor reported by Weaver *et al.* to influence NR3C1 expression (*Nat. Neurosci.* 2004), GWAS = genome wide association study
